# Supplementary material
Source: HighWire-hosted journal article supplement (https://erj.ersjournals.com/content/55/4/2000815)
Supplement: inline-supplementary-material-5 [file inline-supplementary-material-5.pdf]

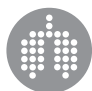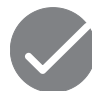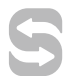

SHAREABLE PDF

# Managing the supportive care needs of those affected by COVID-19

Sabrina Bajwah <sup>1</sup>, Andrew Wilcock <sup>2</sup>, Richard Towers<sup>3</sup>, Massimo Costantini<sup>4</sup>, Claudia Bausewein<sup>5</sup>, Steffen T. Simon<sup>6</sup>, Elisabeth Bendstrup<sup>7</sup>, Wendy Prentice<sup>3</sup>, Miriam J. Johnson<sup>8</sup>, David C. Currow<sup>9</sup>, Michael Kreuter<sup>10</sup>, Athol U. Wells<sup>11</sup>, Surinder S. Birring<sup>12</sup>, Polly Edmonds<sup>3</sup> and Irene J. Higginson <sup>1</sup>

**Affiliations:** <sup>1</sup>Cicely Saunders Institute, Dept of Palliative Care Policy and Rehabilitation, King's College London, London, UK. <sup>2</sup>University of Nottingham, Nottingham, UK. <sup>3</sup>Dept of Palliative Care, King's College Hospital, London, UK. <sup>4</sup>Azienda USL-IRCCS di Reggio Emilia, Reggio Emilia, Italy. <sup>5</sup>Dept of Palliative Medicine, LMU Klinikum, Ludwig-Maximilians-University, Munich, Germany. <sup>6</sup>Dept of Palliative Medicine and Center for Integrated Oncology, University of Cologne, Faculty of Medicine and University Hospital, Cologne, Germany. <sup>7</sup>Centre for Rare Lung Diseases, Dept of Respiratory Diseases and Allergy, Aarhus University Hospital, Aarhus, Denmark. <sup>8</sup>Wolfson Palliative Care Research Centre, Hull York Medical School, University of Hull, Hull, UK. <sup>9</sup>IMPACCT, Faculty of Health, University of Technology Sydney, Ultimo, Australia. <sup>10</sup>Center for Interstitial and Rare Lung Diseases, Thoraxklinik, University of Heidelberg, German Center for Lung Research, Heidelberg, Germany. <sup>11</sup>Royal Brompton Hospital, London, UK. <sup>12</sup>Centre for Human and Applied Physiological Sciences, School of Basic and Medical Biosciences, Faculty of Life Sciences and Medicine, King's College London, London, UK.

**Correspondence:** Sabrina Bajwah, Cicely Saunders Institute, Dept of Palliative Care Policy and Rehabilitation, King's College London, Bessemer Road, London SE5 9PJ, UK. Email: [sabrina.bajwah@kcl.ac.uk](mailto:sabrina.bajwah@kcl.ac.uk)

@ERSpublications

**For patients with COVID-19, there is a moral obligation to provide good supportive care to prevent avoidable suffering. This article provides a succinct informative overview, clinical guidance and information sheets for both patients and families.** <https://bit.ly/2UPFsOj>

**Cite this article as:** Bajwah S, Wilcock A, Towers R, *et al.* Managing the supportive care needs of those affected by COVID-19. *Eur Respir J* 2020; 55: 2000815 [<https://doi.org/10.1183/13993003.00815-2020>].

This single-page version can be shared freely online.

Globally, the number of people affected by coronavirus disease 2019 (COVID-19) is rapidly increasing. In most (>80%), the illness is relatively mild and can be self-managed out of hospital. However, for about 20%, the illness causes respiratory compromise severe enough to require hospital admission [1]. Patients with severe and critical disease need full active treatment. This may include oxygen for hypoxaemia and ventilatory support, along with optimal management of complications, *e.g.* super-imposed bacterial infection, and any underlying comorbidities, *e.g.* COPD or congestive heart failure. To date, no antiviral agent has shown to be effective in treating the disease [2].
